# Supplementary material
Source: publisher site journal article supplement (https://www.spandidos-publications.com/4175/downloadSupplementary)
Supplement: Supplementary file 1 [file downloadSupplementary]

## Sheet: GSE83521_diff_logFC1_p0.05
Table SVI. Differentially expressed circRNAs in GSE83521 dataset.
gene_name	logFC	AveExpr	t	P.Value	adj.P.Val	B	UP_DOWN	GSM2205868	GSM2205869	GSM2205870	GSM2205871	GSM2205872	GSM2205873	GSM2205874	GSM2205875	GSM2205876	GSM2205877	GSM2205878	GSM2205879
hsa_circRNA_000200	-1.54783	7.47951	-2.3966	0.0330705	0.156858	-3.89683	DOWN	8.73474	10.9851	6.4339	6.75841	7.76347	8.84497	6.58724	7.14173	5.76394	7.3436	6.85842	6.53866
hsa_circRNA_000280	1.11244	9.711	3.85403	0.00215314	0.0386684	-1.30972	UP	8.29799	8.16746	9.96343	9.71423	9.44908	9.33653	10.2115	10.4073	10.0276	10.1521	10.4063	10.3985
hsa_circRNA_000624	1.41341	8.77988	6.95132	1.27209e-05	0.00781315	3.57075	UP	7.56647	7.7354	8.35762	8.18587	8.16713	8.42656	9.79835	9.48538	8.91784	9.11221	9.78704	9.81867
hsa_circRNA_000684	-1.95386	10.2535	-4.86674	0.000349462	0.0189011	0.439213	DOWN	11.6571	12.157	10.3441	12.02	11.2506	9.95395	9.1402	8.67636	10.3467	8.86346	9.47944	9.15337
hsa_circRNA_000936	-1.45839	7.01441	-3.84819	0.00217656	0.0388617	-1.32012	DOWN	7.63464	6.20222	9.33197	8.0297	7.84994	7.41319	6.16973	6.4717	6.24672	6.19095	6.28363	6.34858
hsa_circRNA_001059	-1.11157	11.6862	-5.66961	9.08333e-05	0.0127939	1.72634	DOWN	12.8111	11.4492	12.3003	12.2236	12.3509	12.3166	11.1961	11.4212	10.9412	11.3385	11.0826	10.8027
hsa_circRNA_001108	1.00361	12.4564	2.53047	0.0258047	0.140769	-3.66777	UP	10.6135	10.5916	12.7202	12.4619	12.7327	12.6079	12.9098	13.0613	12.7857	12.7328	13.1516	13.1083
hsa_circRNA_001175	1.44166	11.7102	2.27908	0.0410353	0.180291	-4.09437	UP	10.2113	8.9874	11.1422	10.0735	11.7942	13.7276	12.6185	11.9852	12.0091	12.0659	13.0803	12.8272
hsa_circRNA_001241	-1.05365	7.7318	-2.54682	0.025031	0.139006	-3.63953	DOWN	9.01654	10.0299	7.1433	7.44805	7.86698	8.047	7.25254	7.21092	6.83576	7.66996	7.24348	7.01718
hsa_circRNA_001288	-1.18224	7.52504	-2.32842	0.0374906	0.170065	-4.01188	DOWN	10.1197	9.12399	6.71053	6.84692	8.02913	7.86672	7.17931	7.52429	6.45156	6.94267	6.89711	6.60862
hsa_circRNA_001359	1.06597	8.11451	3.8375	0.00222004	0.0390573	-1.33914	UP	8.47966	7.70092	7.08544	7.05722	7.09739	8.06853	8.3285	9.08257	7.99674	8.75097	9.04217	8.68403
hsa_circRNA_001459	-1.494	7.4783	-2.46742	0.029011	0.147505	-3.77615	DOWN	9.26029	10.8244	6.48735	7.03444	7.67121	8.07417	6.65653	7.08658	6.06764	7.2659	6.77904	6.53211
hsa_circRNA_001498	1.0947	10.0574	4.86526	0.000350358	0.0189011	0.436754	UP	8.72025	8.98133	10.0583	10.0452	9.70283	9.55221	10.3745	10.4187	10.5469	10.8468	10.7132	10.7283
hsa_circRNA_001653	-1.68271	12.1744	-2.77024	0.0164757	0.113192	-3.24911	DOWN	14.3026	15.0065	11.2893	12.2093	12.7621	12.525	11.4922	12.0028	9.97265	12.4945	11.2969	10.7394
hsa_circRNA_002117	1.05491	9.07545	4.06318	0.00146522	0.0334632	-0.939417	UP	8.19376	8.52341	8.85213	8.40867	8.73212	8.57785	9.71072	9.51152	8.5921	10.4844	10.0014	9.31728
hsa_circRNA_100021	1.02257	9.53775	4.053	0.0014928	0.0334632	-0.957363	UP	9.12142	7.98135	9.18547	8.94758	9.11209	9.81089	9.98671	10.0944	9.73715	9.71516	10.3474	10.4134
hsa_circRNA_100040	-1.64306	7.63836	-6.06005	4.87303e-05	0.0115116	2.31581	DOWN	8.55712	9.49037	8.66371	7.97705	7.88624	8.18484	6.86344	7.12705	6.0884	7.1978	6.94385	6.68044
hsa_circRNA_100051	-1.27823	8.31289	-2.95913	0.011543	0.0975516	-2.9139	DOWN	10.7746	7.16297	9.14357	9.05032	8.97569	8.60492	7.74676	7.90696	7.64324	7.56053	7.56158	7.62357
hsa_circRNA_100072	-1.15154	7.50841	-2.24646	0.0435519	0.185503	-4.14854	DOWN	8.8765	10.2963	6.83598	6.8937	7.50217	8.1004	6.76626	7.13084	6.35947	7.54921	6.95022	6.83983
hsa_circRNA_100089	1.24773	8.17571	5.1549	0.000213266	0.0189011	0.912487	UP	7.15259	6.88959	8.27492	7.96098	7.85512	7.17788	8.409	8.72827	8.49833	8.8901	9.14035	9.13142
hsa_circRNA_100136	-1.28178	7.16728	-3.12177	0.00849165	0.0814933	-2.6229	DOWN	8.71754	9.38591	6.60117	7.00748	7.51089	7.62605	6.44932	6.74141	6.05455	7.03424	6.54696	6.33187
hsa_circRNA_100267	-2.38822	7.03152	-6.11171	4.49479e-05	0.0115029	2.39197	DOWN	8.71749	6.33442	9.03882	8.55254	8.61256	8.09798	5.85065	5.6242	5.37525	6.31282	6.29019	5.57136
hsa_circRNA_100269	2.25597	10.0357	3.18117	0.00759109	0.0770899	-2.51629	UP	7.45417	7.17351	8.89901	8.1634	9.79602	11.9599	10.7548	11.0799	10.2864	10.7374	12.2376	11.8857
hsa_circRNA_100385	-2.84223	8.03062	-4.26772	0.00100993	0.0280509	-0.581222	DOWN	11.7056	6.21414	9.67167	9.68805	10.1809	9.25005	6.69068	6.69396	6.51447	6.33194	6.66619	6.75979
hsa_circRNA_100453	1.281	7.66551	4.96601	0.000294417	0.0189011	0.603626	UP	6.87633	6.72197	7.11198	7.14376	7.15317	7.14285	9.44661	8.70302	7.92065	7.70931	7.93831	8.11812
hsa_circRNA_100476	1.34835	8.16031	2.68339	0.0193929	0.120428	-3.40181	UP	6.23652	6.31939	7.59679	7.44016	7.61928	9.70465	9.04776	8.5607	8.33511	8.36062	9.01127	9.69141
hsa_circRNA_100477	1.1862	8.66611	2.62132	0.0217823	0.12989	-3.51025	UP	7.26757	6.81526	8.15289	7.99347	8.10199	10.1069	9.43767	8.8853	9.03365	8.68692	9.62868	9.88306
hsa_circRNA_100493	-1.56329	6.77196	-4.878	0.00034271	0.0189011	0.457935	DOWN	7.7146	6.06568	8.58991	7.85259	7.70202	7.39683	5.82603	5.93914	6.26166	5.7229	6.12725	6.06489
hsa_circRNA_100571	1.73229	10.8376	5.00462	0.000275526	0.0189011	0.667197	UP	9.4172	8.87895	10.48	9.97876	9.89359	11.1804	11.8013	11.9024	10.9589	11.9696	12.2247	11.3657
hsa_circRNA_100604	1.05566	11.0124	2.39469	0.0331873	0.157039	-3.90007	UP	11.1148	8.95631	10.5442	9.8316	10.4001	12.0603	12.0107	11.0577	11.4846	10.7711	12.0467	11.8706
hsa_circRNA_100641	-1.13489	9.25365	-6.32734	3.22082e-05	0.010115	2.70532	DOWN	10.4706	9.14279	9.703	10.043	9.88776	9.67948	8.76107	8.62208	8.80639	8.55152	8.74033	8.63583
hsa_circRNA_100660	-1.01456	6.77839	-2.26923	0.0417805	0.181338	-4.11076	DOWN	7.36854	9.31425	6.48872	6.42271	6.53786	7.58196	5.97978	7.14769	5.88796	6.2433	5.94965	6.41828
hsa_circRNA_100737	1.03097	9.2709	3.90643	0.00195444	0.03728	-1.21661	UP	9.06213	8.12038	8.79493	8.50309	8.6164	9.43556	10.3473	10.3351	9.04064	9.71288	9.91661	9.36577
hsa_circRNA_100754	1.10789	10.7424	3.91707	0.00191646	0.0369833	-1.19773	UP	9.14347	9.4453	10.9427	10.5128	10.2697	10.8167	11.4655	11.3172	11.1991	11.1037	11.3719	11.3207
hsa_circRNA_100770	1.69809	8.93703	4.70455	0.0004637	0.0194018	0.167588	UP	7.18697	7.31678	9.22134	9.06108	8.41339	7.32839	10.2845	9.81659	9.59375	9.80484	9.66683	9.54991
hsa_circRNA_100862	1.05577	8.86741	4.62871	0.000529899	0.0205009	0.0393211	UP	7.79987	7.56987	8.74952	8.53863	8.54451	8.83476	9.18002	9.21041	9.11508	9.43675	9.80017	9.62934
hsa_circRNA_100974	1.50224	8.04115	4.0704	0.001446	0.0334632	-0.926707	UP	7.35203	6.52717	7.18477	6.71514	8.15405	7.80702	9.06752	8.65102	7.37677	9.51553	9.37076	8.77201
hsa_circRNA_100984	-3.54226	9.43969	-4.89294	0.000333963	0.0189011	0.482743	DOWN	13.0477	7.58943	11.8259	12.0519	12.2402	10.5099	7.53714	7.40308	7.93916	7.49944	7.73916	7.89336
hsa_circRNA_101010	-1.43348	6.40033	-4.68025	0.000483918	0.0195541	0.126575	DOWN	7.49699	5.64564	8.04662	7.42673	6.93876	7.14768	5.61065	5.69913	5.74598	5.62479	5.72489	5.69612
hsa_circRNA_101207	-1.12997	6.38957	-4.47486	0.00069619	0.0237555	-0.223186	DOWN	6.93682	5.94558	7.79997	7.25626	7.18635	6.60237	5.71102	5.5895	5.96856	5.68369	5.88401	6.11074
hsa_circRNA_101251	1.2125	10.2098	2.68378	0.0193788	0.120428	-3.40113	UP	8.11744	8.39704	11.0058	10.5181	9.40939	10.1734	10.4207	10.9212	10.66	10.8822	10.5973	11.4149
hsa_circRNA_101267	-1.75904	7.21438	-4.03549	0.00154146	0.0334632	-0.988233	DOWN	9.28891	5.97452	8.51924	8.6194	8.48672	7.6746	6.1865	6.12679	6.66901	6.23	6.43441	6.36244
hsa_circRNA_101287	1.47836	13.0338	2.27688	0.041201	0.180291	-4.09804	UP	10.7705	11.2323	12.6938	10.8305	13.014	15.227	13.8593	13.5227	13.4956	13.3963	14.3408	14.0234
hsa_circRNA_101308	-2.35255	8.74326	-2.88899	0.0131753	0.102693	-3.03879	DOWN	12.4663	12.1745	9.36335	8.99164	8.71501	7.80645	9.57853	6.93478	6.82293	7.88484	6.67568	7.50514
hsa_circRNA_101309	-2.51336	7.93843	-4.712	0.000457684	0.0194018	0.180136	DOWN	10.8135	6.51582	9.61811	9.49673	9.60492	9.12162	6.76245	6.53682	6.83316	6.36209	6.72438	6.87162
hsa_circRNA_101320	-1.44974	9.42581	-2.84187	0.0143984	0.106247	-3.12244	DOWN	11.8119	7.69773	10.5495	10.445	10.598	9.80205	8.81923	8.53678	8.72001	8.4039	8.85087	8.87482
hsa_circRNA_101367	-1.23955	9.00803	-2.60899	0.02229	0.130942	-3.53171	DOWN	11.4226	7.91397	9.09214	9.18568	9.68001	10.4725	8.65719	7.84286	7.8735	8.607	8.8068	8.54217
hsa_circRNA_101369	-1.08119	8.92672	-2.83575	0.0145653	0.106247	-3.13329	DOWN	10.1362	8.20632	9.90888	9.89248	9.81547	8.84449	8.03438	8.21416	9.73863	7.85174	8.29595	8.18188
hsa_circRNA_101407	1.09033	9.42924	2.52779	0.0259339	0.140769	-3.6724	UP	7.68617	8.52089	8.92082	8.21765	9.11477	10.8442	9.70092	10.2767	9.86671	9.34947	10.1944	10.4583
hsa_circRNA_101419	1.59106	10.6397	4.26556	0.00101389	0.0280509	-0.584985	UP	9.42382	9.16049	9.39106	10.5628	10.6961	9.83082	11.9093	12.7541	10.987	11.1089	11.177	10.6752
hsa_circRNA_101448	-1.34281	7.39934	-3.09677	0.00890205	0.0838848	-2.66773	DOWN	9.24399	6.08631	8.54615	8.68342	8.40977	7.45486	6.4619	6.72526	7.25372	6.51541	6.58673	6.82461
hsa_circRNA_101471	-3.07324	9.00533	-5.69339	8.73982e-05	0.0127939	1.76295	DOWN	12.0947	8.17177	11.3153	11.0434	11.0349	9.59171	7.61687	7.57754	8.07325	7.14556	7.28513	7.11393
hsa_circRNA_101491	-1.17398	13.3993	-2.69979	0.0188058	0.11954	-3.37306	DOWN	14.9515	15.2137	13.0187	13.9428	13.8978	12.8929	12.6905	13.2798	12.0861	13.8927	12.7059	12.2185
hsa_circRNA_101525	-1.14775	10.3219	-2.38752	0.0336287	0.158395	-3.91221	DOWN	11.7324	12.678	9.18381	9.92828	10.6088	11.2433	9.96244	10.1329	9.2608	9.88843	9.69105	9.55243
hsa_circRNA_101539	1.10988	8.62038	2.83891	0.0144788	0.106247	-3.12768	UP	7.23784	7.47007	9.73327	8.68567	7.97239	7.29337	9.82815	8.86281	9.18225	8.75069	9.24285	9.18515
hsa_circRNA_101584	1.09668	8.39823	5.00934	0.000273304	0.0189011	0.674955	UP	7.69494	7.84856	8.32246	8.21794	7.57102	7.44444	9.50474	9.33079	8.67376	9.07211	8.30941	8.78863
hsa_circRNA_101608	-1.38712	6.55295	-4.90423	0.000327503	0.0189011	0.501483	DOWN	7.27557	5.96185	8.16169	7.46201	7.48044	7.13747	5.80828	5.57618	5.72882	6.14983	5.96173	5.93146
hsa_circRNA_101707	1.0367	13.6305	2.30082	0.0394359	0.175773	-4.05811	UP	12.6101	12.331	12.9093	11.8618	13.9069	15.0538	14.2812	13.9544	13.9616	13.7095	14.5272	14.4591
hsa_circRNA_101740	1.42801	11.803	2.72728	0.0178606	0.116702	-3.32479	UP	9.44011	9.24322	12.5913	11.5511	11.6645	12.044	12.3213	12.559	12.3889	12.3362	12.6792	12.8178
hsa_circRNA_101794	-1.01834	7.09135	-4.59667	0.000560755	0.0205009	-0.0150969	DOWN	7.62487	6.73316	8.29002	7.93479	7.78047	7.23983	6.63043	6.29937	6.74299	6.45448	6.66216	6.70366
hsa_circRNA_101800	-1.7429	7.60962	-4.05221	0.00149497	0.0334632	-0.958759	DOWN	10.0795	6.52741	8.87268	8.60593	8.6093	8.19161	6.83074	6.88137	6.59867	6.58474	6.72047	6.813
hsa_circRNA_101846	1.34606	9.40922	5.16399	0.000210011	0.0189011	0.927205	UP	8.25368	7.92817	9.46316	9.21304	8.89839	8.66071	9.79835	10.0091	9.78743	9.83851	10.38	10.6802
hsa_circRNA_101882	-1.67562	7.67802	-11.1349	7.86642e-08	0.000241578	8.00158	DOWN	9.01644	8.55207	8.50514	8.59157	8.46387	7.96588	6.81016	6.69682	7.10367	6.75019	6.84651	6.83393
hsa_circRNA_101909	-2.06608	6.47863	-4.74673	0.000430671	0.0192118	0.238583	DOWN	7.72235	5.42034	8.86399	7.91389	7.86214	7.2873	5.36128	5.41546	5.65275	5.01354	5.55096	5.67953
hsa_circRNA_101968	1.18694	8.56554	5.74668	8.01913e-05	0.0127939	1.84462	UP	8.24591	8.02327	8.08124	8.17713	7.99413	7.31076	9.50686	9.42646	8.38976	9.03659	9.32747	9.26691
hsa_circRNA_102004	-1.85833	7.24071	-4.1369	0.00128065	0.031463	-0.809826	DOWN	9.70524	6.08169	8.61789	8.38174	8.38658	7.84612	6.55396	6.46674	6.01114	6.0959	6.41225	6.32929
hsa_circRNA_102082	-1.81464	8.02389	-2.46924	0.0289131	0.147505	-3.77303	DOWN	10.123	12.184	7.01197	7.42681	8.07405	8.76743	7.00537	7.52249	6.46685	7.87383	6.95414	6.87675
hsa_circRNA_102089	1.16893	11.9411	2.72134	0.0180605	0.117307	-3.33521	UP	10.088	9.84437	12.1496	11.7262	12.2516	12.0801	12.3548	12.1693	12.3976	12.3697	13.2384	12.6235
hsa_circRNA_102191	-4.07073	8.33775	-5.89306	6.34361e-05	0.0118521	2.06666	DOWN	12.0448	6.88588	11.352	11.1495	11.1127	9.69389	6.29563	6.1625	6.53106	6.37043	6.1711	6.28359
hsa_circRNA_102195	1.11881	9.12884	3.43673	0.0046907	0.0573909	-2.05684	UP	7.9961	7.51594	9.78135	8.98008	8.7783	8.36484	9.37949	9.42332	9.83837	9.34005	10.039	10.1093
hsa_circRNA_102216	1.02924	8.21974	2.53395	0.0256382	0.140769	-3.66177	UP	7.57923	6.53	9.13106	8.3482	7.82263	6.8196	8.39419	8.27195	8.30548	9.54184	9.14037	8.75234
hsa_circRNA_102415	-1.99826	9.63009	-8.05573	2.77554e-06	0.00284123	4.95831	DOWN	11.8231	10.4745	10.4657	10.4456	10.6068	9.95974	8.78437	8.85526	8.45645	8.62313	8.4092	8.65737
hsa_circRNA_102421	1.04311	7.8541	3.06585	0.00943712	0.0859982	-2.72313	UP	7.98485	6.72607	7.15422	6.70856	7.70877	7.71278	9.01937	8.37399	7.00856	8.82746	8.7473	8.27726
hsa_circRNA_102465	1.09297	11.2334	3.24558	0.00672258	0.0726938	-2.40057	UP	10.0459	9.44043	10.5332	11.0682	11.3163	11.7172	12.0603	11.4494	11.6412	11.4482	12.0867	11.9932
hsa_circRNA_102476	1.26145	10.2863	2.65111	0.0206016	0.124542	-3.45828	UP	10.5015	9.6758	8.654	8.59275	9.21357	11.2961	11.2114	11.6075	9.55273	11.1959	11.0692	10.8657
hsa_circRNA_102485	-1.37891	10.3522	-3.75318	0.00259594	0.0425839	-1.48947	DOWN	10.6446	11.9555	10.2497	11.8847	11.4348	10.0805	9.41097	9.23499	10.6875	9.39179	9.81441	9.43674
hsa_circRNA_102509	-1.41649	9.98274	-2.28285	0.0407537	0.180078	-4.08809	DOWN	11.7146	13.0341	8.7777	9.32924	10.4698	10.8204	9.16806	9.73228	8.21796	10.1062	9.32366	9.09883
hsa_circRNA_102550	1.19369	9.86001	3.62444	0.00329973	0.0472665	-1.7198	UP	8.55091	8.14838	10.4336	9.96811	9.17332	9.30464	10.351	10.3875	10.3918	10.3897	10.3233	10.8978
hsa_circRNA_102561	-3.2951	7.21669	-4.92195	0.000317635	0.0189011	0.530832	DOWN	10.6589	5.459	9.61688	9.44792	9.58617	8.41658	5.4818	5.487	5.76193	5.5013	5.45778	5.72502
hsa_circRNA_102564	-1.91019	6.8798	-4.38413	0.000818887	0.025402	-0.379387	DOWN	8.66196	5.632	8.8127	8.08953	8.24734	7.56584	5.83203	6.09681	6.0281	5.75445	6.02178	5.81506
hsa_circRNA_102571	-2.54184	7.56986	-4.29612	0.000959435	0.0272856	-0.531846	DOWN	9.64373	5.68127	9.67239	9.5826	9.65779	8.80691	6.27373	6.20506	6.27301	5.98152	6.28375	6.77658
hsa_circRNA_102581	1.09934	8.1012	3.10114	0.00882893	0.0838848	-2.6599	UP	6.75071	6.60155	7.82862	7.61354	7.57346	8.94131	8.5246	8.5114	8.57093	8.01517	9.03765	9.24549
hsa_circRNA_102584	-2.82635	7.36377	-5.66407	9.16528e-05	0.0127939	1.7178	DOWN	9.95795	6.19571	9.4195	9.24597	9.2897	8.55284	5.81722	6.02288	6.1475	5.75247	5.97744	5.98607
hsa_circRNA_102592	-3.14985	8.51732	-7.36292	7.0874e-06	0.00544135	4.1088	DOWN	11.1397	8.69092	10.369	10.3219	10.6384	9.39344	6.70262	6.5422	6.11928	7.69268	6.60748	7.99009
hsa_circRNA_102614	-5.08754	9.16433	-5.34998	0.000153654	0.0174767	1.22579	DOWN	13.6189	6.74241	13.0842	12.9014	12.883	11.0188	6.58325	6.54154	6.83644	6.50158	6.58954	6.67099
hsa_circRNA_102615	-3.39779	10.5848	-4.3603	0.000854693	0.0259949	-0.420576	DOWN	14.0428	8.37765	13.1786	13.4078	13.277	11.4182	8.72624	9.35167	8.68102	8.92537	8.92397	8.70712
hsa_circRNA_102747	-1.17031	7.14745	-2.38196	0.0339751	0.159325	-3.92163	DOWN	8.81145	9.58348	6.52656	6.34617	7.33217	7.79581	6.58257	6.89221	6.1638	7.07641	6.4897	6.16909
hsa_circRNA_102777	-3.39704	8.034	-4.56538	0.000592692	0.0214136	-0.0683637	DOWN	11.9192	6.02207	10.4821	10.2596	10.5479	9.16431	6.25639	6.45796	6.56055	6.22556	6.25034	6.26209
hsa_circRNA_102815	-2.78768	7.22088	-4.81286	0.000383744	0.019041	0.349381	DOWN	10.5038	5.7569	8.89752	8.97904	9.14986	8.40119	5.77302	5.72171	5.91513	5.74502	5.82388	5.98345
hsa_circRNA_102849	1.10271	7.65853	3.91414	0.00192684	0.0369833	-1.20293	UP	6.21102	6.58381	7.78482	7.71201	7.47106	6.8803	8.08665	8.6583	7.6467	8.43947	7.98376	8.44441
hsa_circRNA_102850	1.41752	8.32506	4.40639	0.000786848	0.0249114	-0.340977	UP	6.49765	7.03964	8.43782	8.22843	8.05027	7.44399	9.0005	9.46285	8.33138	9.32595	8.86443	9.21779
hsa_circRNA_102954	1.20281	10.6304	2.32346	0.0378336	0.171115	-4.02021	UP	8.7946	8.88362	9.97064	9.59861	10.5203	12.4065	11.2671	10.7369	10.8809	11.0483	11.7348	11.723
hsa_circRNA_102956	1.14276	8.422	2.75011	0.0171109	0.114193	-3.2846	UP	6.75139	6.89128	9.11107	7.93774	7.88802	8.52421	8.59516	8.79117	8.66391	8.44737	9.29341	10.1693
hsa_circRNA_102990	1.04942	8.62919	5.08544	0.000239978	0.0189011	0.799532	UP	7.72743	8.11082	8.45514	8.46294	8.41482	7.45572	9.12806	9.57217	8.63446	9.31021	9.0282	9.25027
hsa_circRNA_103053	-2.325	7.50646	-5.0228	0.000267077	0.0189011	0.697045	DOWN	9.43147	6.15015	9.10759	9.00485	9.0478	9.27191	6.35801	6.28099	6.53734	6.17664	6.39365	6.31712
hsa_circRNA_103102	1.91482	10.7644	4.16152	0.00122451	0.030752	-0.76668	UP	9.9432	8.46711	9.80554	9.37354	9.38319	11.8691	11.8389	12.1969	10.8553	12.044	12.0033	11.3922
hsa_circRNA_103120	1.08094	7.15538	5.44811	0.000130553	0.0167054	1.38118	UP	6.59826	6.39455	6.89078	6.8839	6.61242	6.30952	8.05101	8.18663	7.96095	7.63794	7.17136	7.1672
hsa_circRNA_103122	-4.49176	8.86127	-5.09565	0.000235842	0.0189011	0.816179	DOWN	12.8314	6.45399	12.2326	12.3192	12.1749	10.6309	6.63029	6.74495	6.70968	6.39255	6.64397	6.57092
hsa_circRNA_103165	-1.02138	8.60824	-3.51248	0.004069	0.0540948	-1.92071	DOWN	9.43825	7.723	9.51304	9.73503	9.53399	8.77028	8.26757	7.89893	8.23762	8.07342	8.05101	8.05679
hsa_circRNA_103257	1.00638	7.25769	5.00667	0.000274561	0.0189011	0.670558	UP	6.9477	6.25222	6.90987	7.0606	6.90867	6.44793	7.59654	8.25592	8.2864	7.42602	7.46113	7.53928
hsa_circRNA_103270	1.07417	7.63349	6.31225	3.29611e-05	0.010115	2.68364	UP	7.07593	6.453	7.4666	7.49597	7.24062	6.8463	8.28608	8.2619	8.16614	7.91061	8.12144	8.27725
hsa_circRNA_103307	1.31181	11.5511	3.80032	0.00237841	0.0401325	-1.40538	UP	9.52229	10.1173	11.6366	11.5484	11.1636	11.3828	12.6873	12.1756	12.0023	11.8253	12.1063	12.4451
hsa_circRNA_103361	-1.08833	12.4336	-2.53848	0.0254231	0.140327	-3.65395	DOWN	13.8603	14.3228	11.6116	12.5578	12.888	12.6259	12.1298	12.4295	11.1844	12.6531	11.7247	11.2149
hsa_circRNA_103519	1.54263	8.68546	3.49234	0.00422561	0.0552614	-1.95688	UP	6.93697	6.81239	8.41053	7.98176	8.07725	9.26597	9.66772	8.65731	9.14741	8.68531	10.1261	10.4569
hsa_circRNA_103548	1.11765	9.67905	2.89642	0.0129921	0.101783	-3.02559	UP	7.91479	8.16459	9.63491	9.32025	9.0925	10.5943	10.3096	10.1574	9.82167	9.95305	10.5247	10.6609
hsa_circRNA_103556	-1.24827	7.07659	-3.45385	0.00454224	0.0571689	-2.02606	DOWN	8.24654	5.93665	8.5998	8.1743	7.94526	7.30183	6.37583	6.44741	6.56332	6.41733	6.38681	6.52403
hsa_circRNA_103559	-3.22174	8.69393	-4.29825	0.000955753	0.0272856	-0.528145	DOWN	12.0752	6.62848	11.1914	11.0286	11.1771	9.72807	7.04869	6.62073	6.48725	7.94898	7.63153	6.7612
hsa_circRNA_103594	-2.63586	8.66395	-4.36015	0.000854928	0.0259949	-0.42084	DOWN	11.1863	6.86224	10.9419	10.6985	10.7071	9.49528	7.31221	7.2679	7.46764	7.16296	7.42141	7.44402
hsa_circRNA_103609	1.0806	7.24617	5.87191	6.56089e-05	0.0118521	2.03479	UP	6.92487	6.137	7.05244	6.80231	6.84637	6.47223	7.63196	8.28189	8.08029	7.54884	7.67261	7.50322
hsa_circRNA_103684	1.463	8.31992	2.90149	0.0128686	0.10149	-3.01658	UP	7.04043	6.85331	7.34575	7.19275	7.62772	9.47059	8.32103	9.37078	8.77426	7.694	9.90868	10.2398
hsa_circRNA_103781	1.89151	11.4651	4.33087	0.000901174	0.0266611	-0.471546	UP	9.68808	8.51328	11.219	11.2922	11.3381	11.0657	12.2623	12.5881	12.1959	12.3977	12.6571	12.3644
hsa_circRNA_103783	-2.36002	8.36179	-3.60839	0.00340021	0.0483427	-1.74857	DOWN	11.2653	6.32989	10.1605	10.1528	10.2442	9.09807	6.98152	6.89341	8.04789	7.03762	6.81902	7.31123
hsa_circRNA_103801	-1.36116	10.3934	-2.39859	0.0329495	0.156858	-3.89346	DOWN	12.4672	13.1286	9.32166	10.2614	10.9087	10.3561	9.98633	9.7294	8.98397	10.4867	9.80412	9.28621
hsa_circRNA_103804	-1.12764	8.34931	-3.08726	0.00906326	0.0845996	-2.68477	DOWN	9.87345	7.16907	9.34899	9.3474	9.30031	8.43954	8.02668	7.71045	7.74755	7.69419	7.808	7.72608
hsa_circRNA_103808	1.50698	10.8412	3.18821	0.00749089	0.0770899	-2.50365	UP	9.01393	8.7229	10.5375	9.91029	10.2357	12.1058	11.3791	11.2802	11.3694	11.3244	12.1885	12.0264
hsa_circRNA_103999	1.60612	11.8124	3.16477	0.00782967	0.0770899	-2.54574	UP	9.89679	9.5318	11.5293	10.4084	11.7197	12.9702	12.3571	12.3301	12.2592	12.3507	13.198	13.198
hsa_circRNA_104040	-1.54187	8.31687	-4.61394	0.000543894	0.0205009	0.0142581	DOWN	10.4006	7.9214	9.43178	9.29598	9.13273	8.34433	7.704	7.71205	7.57652	7.4471	7.20949	7.62646
hsa_circRNA_104111	1.00269	9.11103	5.95093	5.78694e-05	0.0118478	2.15352	UP	8.04216	8.28553	9.08853	8.92335	8.75547	8.56307	9.59286	9.87015	9.46915	9.57003	9.64732	9.52476
hsa_circRNA_104127	1.08829	7.74943	2.96071	0.0115085	0.0975516	-2.91107	UP	6.5924	6.77717	7.71976	8.15465	7.22315	6.76458	8.29657	9.6848	8.12653	7.54358	7.66856	8.44142
hsa_circRNA_104165	1.24014	10.8717	2.87616	0.0134978	0.103407	-3.06159	UP	9.64033	8.65571	10.117	10.3001	10.8496	11.9469	11.5364	11.5601	11.3042	10.9246	11.737	11.8881
hsa_circRNA_104256	1.0225	9.40427	2.98302	0.0110341	0.0949184	-2.87126	UP	7.69446	8.03301	9.4184	9.2	8.93789	10.0744	9.86003	9.89679	9.59208	9.84413	10.0209	10.2792
hsa_circRNA_104314	-1.06692	6.97681	-2.56267	0.0243027	0.13667	-3.61212	DOWN	8.39092	9.31686	6.52173	6.58446	7.07099	7.17667	6.38894	6.39346	6.32704	6.63458	6.6159	6.30017
hsa_circRNA_104315	-1.29458	8.15787	-2.57154	0.0239043	0.135443	-3.59676	DOWN	9.12452	10.7007	7.13145	7.62646	8.41542	9.83244	7.4747	7.57195	7.4263	7.23907	7.53616	7.81531
hsa_circRNA_104351	1.50014	8.79704	2.90431	0.0128004	0.101314	-3.01156	UP	6.6159	6.70691	9.88799	8.84499	7.88778	8.33821	9.05282	10.31	9.03671	9.28667	9.29339	10.303
hsa_circRNA_104355	1.33008	8.04043	4.88319	0.000339642	0.0189011	0.466563	UP	6.49184	6.82314	8.02887	8.10289	7.27041	7.53519	9.16603	8.4968	8.65571	8.42839	8.45244	9.03344
hsa_circRNA_104423	1.81582	9.16382	3.81748	0.00230391	0.0394336	-1.37479	UP	6.95612	6.8441	8.73882	8.37381	8.74248	9.88011	9.83003	9.61288	10.0492	9.49645	10.6492	10.7925
hsa_circRNA_104482	1.00028	6.89481	6.3582	3.07242e-05	0.010115	2.74955	UP	6.50327	6.10002	6.8933	6.60384	6.23374	6.03383	7.18818	7.63026	7.55704	7.20142	7.2708	7.52202
hsa_circRNA_104513	-1.43417	8.95743	-2.26764	0.0419015	0.181338	-4.1134	DOWN	10.5318	12.3301	8.13436	8.56561	9.12511	9.36013	7.94513	9.11007	7.27815	9.20255	8.16547	7.74071
hsa_circRNA_104589	-2.04188	8.0854	-8.50269	1.56131e-06	0.00239739	5.47087	DOWN	9.66616	8.53092	9.04094	9.157	9.20693	9.03608	7.34712	7.33621	6.19347	7.6078	6.76541	7.13676
hsa_circRNA_104593	1.24496	9.40285	2.42939	0.0311274	0.152703	-3.8411	UP	7.48948	7.99934	9.00962	8.33095	8.88228	10.9705	9.54421	9.39296	9.90245	9.62355	10.5926	11.0962
hsa_circRNA_104666	-1.25588	8.64796	-2.17207	0.0498467	0.197172	-4.27086	DOWN	11.8231	7.15447	9.02585	9.25849	9.76264	8.63083	8.64178	7.84764	8.02933	7.61394	8.02472	7.9627
hsa_circRNA_104745	1.48023	9.23231	3.21044	0.00718322	0.0754651	-2.46371	UP	7.12272	7.78716	9.92736	9.80239	8.66832	7.64519	10.5521	9.93539	9.51695	10.3884	9.77679	9.66487
hsa_circRNA_104760	1.26303	10.809	2.3543	0.0357502	0.164717	-3.96835	UP	10.007	8.76917	9.83003	9.37876	10.2264	12.8533	11.627	11.5667	10.9053	11.0962	11.6751	11.7725
hsa_circRNA_104780	-1.02203	8.22548	-2.57699	0.0236626	0.134947	-3.58731	DOWN	9.09717	9.88799	7.43153	8.00169	8.79944	9.20112	7.60441	7.5564	6.9699	8.73974	7.95691	7.45942
hsa_circRNA_104807	-3.04963	8.03475	-4.04621	0.00151148	0.0334632	-0.969332	DOWN	12.3335	6.12219	10.0654	10.0262	10.0135	8.79647	6.72475	6.31773	6.28101	6.75205	6.63843	6.34563
hsa_circRNA_104872	1.27113	11.4829	2.26746	0.0419154	0.181338	-4.1137	UP	8.66795	9.41329	12.0478	11.558	11.2523	12.1447	11.8319	12.6596	11.8319	11.7121	12.003	12.6723
hsa_circRNA_104887	-1.06016	6.00888	-5.39618	0.000142284	0.0168059	1.29914	DOWN	7.00201	5.83191	7.13931	6.54816	6.54321	6.16916	5.42256	5.6521	5.39067	5.47455	5.51262	5.42027
hsa_circRNA_104895	-1.04491	6.32591	-3.1837	0.00755496	0.0770899	-2.51175	DOWN	6.85252	5.56368	7.97255	7.39635	6.94751	6.35757	5.5174	6.27808	5.79255	5.83264	5.5565	5.84355
hsa_circRNA_104896	-1.39082	6.71342	-3.30767	0.00598	0.067024	-2.28892	DOWN	7.14185	5.8551	7.85181	7.34859	7.10228	9.15336	6.0434	6.42994	5.4346	5.84636	6.1769	6.1769
hsa_circRNA_104907	-1.13322	6.22387	-3.17549	0.00767284	0.0770899	-2.52649	DOWN	7.49315	8.30286	6.10832	6.1635	6.29651	6.37855	6.11484	5.60444	5.65449	5.70486	5.7484	5.11656
hsa_circRNA_104915	-2.65695	7.63301	-5.28823	0.000170357	0.0180402	1.12726	DOWN	9.78751	6.33436	9.57232	9.56718	9.80589	8.70162	6.40353	6.10265	6.37232	6.33436	6.11484	6.49951
hsa_circRNA_104916	1.7872	10.4575	2.46816	0.0289709	0.147505	-3.77487	UP	7.77156	8.07396	10.0008	8.71785	10.0058	12.8137	11.1358	10.6689	11.045	10.8607	12.1671	12.2293
hsa_circRNA_104947	-2.55316	7.78543	-4.8734	0.00034545	0.0189011	0.450293	DOWN	9.84864	6.28608	9.78751	9.79077	9.69495	8.96412	6.66412	6.41035	6.64991	6.1769	6.36181	6.79004
hsa_circRNA_104994	-1.77389	7.25532	-4.48409	0.000684824	0.0237555	-0.20735	DOWN	8.94132	6.16035	8.90591	8.43518	8.49539	7.91543	6.51922	6.10265	6.56333	6.07063	6.48995	6.46443
hsa_circRNA_400011	-1.17592	8.58391	-2.80038	0.015568	0.11016	-3.19589	DOWN	9.60549	6.98917	9.98122	9.69756	9.61695	9.14085	7.87708	8.02749	7.90054	7.62737	8.29169	8.25152
hsa_circRNA_400033	-1.60519	11.325	-2.43349	0.0308921	0.152035	-3.83411	DOWN	13.3297	14.3955	10.2561	11.0734	11.9385	11.7725	10.469	11.4422	9.06252	11.6834	10.5521	9.92532
hsa_circRNA_400045	-1.08786	9.73149	-2.45534	0.0296675	0.147993	-3.79681	DOWN	12.4034	8.86369	10.2355	10.3848	10.2382	9.52684	9.23464	9.28045	9.23847	9.22854	9.04008	9.1032
hsa_circRNA_400046	-1.03585	6.32098	-2.58167	0.0234565	0.134644	-3.57918	DOWN	7.51432	8.61964	6.00943	6.07486	6.35757	6.45762	5.59912	5.75027	5.36721	6.28239	6.0833	5.73603
hsa_circRNA_400059	1.25552	11.5426	2.74991	0.0171174	0.114193	-3.28496	UP	9.74316	9.19652	11.8958	11.0112	11.8375	11.8047	11.9699	11.8497	12.1447	11.8428	12.7093	12.5056
hsa_circRNA_400066	1.61041	9.83182	4.77988	0.000406441	0.019041	0.294202	UP	8.31594	8.02218	10.1421	9.09366	9.48438	9.10145	10.5104	10.5926	10.3959	9.98238	11.1599	11.181
